# Supplementary material for: Lignocellulose degradation at the holobiont level: teamwork in a keystone soil invertebrate
Source: Microbiome. 2018 Sep 17;6:162. doi: 10.1186/s40168-018-0536-y (PMC6142342; doi:10.1186/s40168-018-0536-y)
Supplement: Supplementary file 5 — Table S3. RPKM values for CAZymes identified in the transcriptome of A. vulgare. (XLSX 50 kb) [file 40168_2018_536_MOESM5_ESM.xlsx]

## Sheet: Trans_ORFs_CAZymes.map
Sequence ID	CAZyme Family	RPKM value
Tr266_AA1	AA1	79.7783
Tr900_AA1	AA1	538.532
Tr1028_AA3	AA3	540.272
Tr1102_AA3	AA3	25.763
Tr1154_AA3	AA3	24.398
Tr150_AA3	AA3	6.2251
Tr432_AA3	AA3	50.2083
Tr438_AA3	AA3	423.716
Tr471_AA3	AA3	111.299
Tr517_AA3	AA3	374.188
Tr723_AA3	AA3	650.985
Tr802_AA3	AA3	39.5559
Tr804_AA3	AA3	1201.92
Tr935_AA3	AA3	82.1859
Tr965_AA3	AA3	34.234
Tr46_AA4	AA4	11.351
Tr584_AA4	AA4	222.05
Tr344_CBM13	CBM13	2817.86
Tr423_CBM13-GT27	CBM13 GT27	1280.27
Tr986_CBM13-GT27	CBM13 GT27	862.165
Tr10_CBM14	CBM14	351.441
Tr1005_CBM14	CBM14	32.1142
Tr1009_CBM14	CBM14	209.912
Tr1010_CBM14	CBM14	616.928
Tr1043_CBM14	CBM14	94.8672
Tr1044_CBM14	CBM14	11.4298
Tr1047_CBM14	CBM14	416.483
Tr1048_CBM14	CBM14	13.5849
Tr105_CBM14	CBM14	623.354
Tr1053_CBM14	CBM14	80.7764
Tr1069_CBM14	CBM14	47.2046
Tr1075_CBM14	CBM14	2679.8
Tr1081_CBM14	CBM14	274.305
Tr1082_CBM14	CBM14	361.651
Tr1083_CBM14	CBM14	24.0487
Tr1092_CBM14	CBM14	2414.08
Tr1097_CBM14	CBM14	947.52
Tr1098_CBM14	CBM14	21.9704
Tr11_CBM14	CBM14	500.896
Tr1100_CBM14	CBM14	499.597
Tr1107_CBM14	CBM14	731.02
Tr1118_CBM14	CBM14	4.6289
Tr1123_CBM14	CBM14	21.1417
Tr1129_CBM14	CBM14	232.248
Tr1131_CBM14	CBM14	100.237
Tr1133_CBM14	CBM14	186.389
Tr1135_CBM14	CBM14	148.902
Tr1136_CBM14	CBM14	1130.08
Tr1137_CBM14	CBM14	305.064
Tr1139_CBM14	CBM14	66.6508
Tr114_CBM14	CBM14	229.751
Tr1143_CBM14	CBM14	605.198
Tr1144_CBM14	CBM14	443.933
Tr1148_CBM14	CBM14	24.025
Tr1151_CBM14	CBM14	4850.1
Tr1163_CBM14	CBM14	3629.73
Tr1170_CBM14	CBM14	2931.01
Tr1175_CBM14	CBM14	305.434
Tr1176_CBM14	CBM14	4994.37
Tr1178_CBM14	CBM14	72.9381
Tr1188_CBM14	CBM14	400.768
Tr1189_CBM14	CBM14	156.813
Tr1190_CBM14	CBM14	44.2867
Tr1191_CBM14	CBM14	52.4337
Tr1194_CBM14	CBM14	523.866
Tr1195_CBM14	CBM14	165.447
Tr1196_CBM14	CBM14	103.288
Tr1197_CBM14	CBM14	382.162
Tr1198_CBM14	CBM14	93.4552
Tr1199_CBM14	CBM14	48.4792
Tr12_CBM14	CBM14	892.163
Tr120_CBM14	CBM14	300.036
Tr1200_CBM14	CBM14	137.421
Tr1201_CBM14	CBM14	242.753
Tr1202_CBM14	CBM14	99.3633
Tr1203_CBM14	CBM14	520.4
Tr1204_CBM14	CBM14	163.309
Tr1205_CBM14	CBM14	195.876
Tr1220_CBM14	CBM14	139.652
Tr1221_CBM14	CBM14	6522.93
Tr1223_CBM14	CBM14	379.327
Tr1237_CBM14	CBM14	66.4591
Tr1249_CBM14	CBM14	1090.06
Tr1255_CBM14	CBM14	36.4461
Tr1256_CBM14	CBM14	582.53
Tr1262_CBM14	CBM14	653.959
Tr1276_CBM14	CBM14	274.11
Tr1277_CBM14	CBM14	22.5303
Tr1278_CBM14	CBM14	1448.03
Tr1281_CBM14	CBM14	379.84
Tr1283_CBM14	CBM14	291.041
Tr1284_CBM14	CBM14	194.626
Tr1285_CBM14	CBM14	209.534
Tr1299_CBM14	CBM14	128.787
Tr13_CBM14	CBM14	26.0034
Tr1304_CBM14	CBM14	97.0776
Tr1305_CBM14	CBM14	682.942
Tr1309_CBM14	CBM14	30.8095
Tr1310_CBM14	CBM14	4436.32
Tr1314_CBM14	CBM14	2205.28
Tr1319_CBM14	CBM14	244.719
Tr1320_CBM14	CBM14	230.004
Tr1321_CBM14	CBM14	139.879
Tr148_CBM14	CBM14	31.7298
Tr152_CBM14	CBM14	18.1851
Tr157_CBM14	CBM14	312.658
Tr16_CBM14	CBM14	96.6653
Tr165_CBM14	CBM14	155.551
Tr17_CBM14	CBM14	202.155
Tr175_CBM14	CBM14	369.953
Tr176_CBM14	CBM14	80.4364
Tr18_CBM14	CBM14	663.702
Tr184_CBM14	CBM14	47.0451
Tr186_CBM14	CBM14	240.062
Tr19_CBM14	CBM14	56.1971
Tr190_CBM14	CBM14	446.576
Tr199_CBM14	CBM14	395.924
Tr2_CBM14	CBM14	137.854
Tr20_CBM14	CBM14	165.812
Tr227_CBM14	CBM14	220.266
Tr233_CBM14	CBM14	114.889
Tr234_CBM14	CBM14	252.163
Tr237_CBM14	CBM14	30.8595
Tr238_CBM14	CBM14	46.0201
Tr242_CBM14	CBM14	782.979
Tr245_CBM14	CBM14	574.007
Tr248_CBM14	CBM14	431.069
Tr252_CBM14	CBM14	1101.24
Tr256_CBM14	CBM14	689.481
Tr267_CBM14	CBM14	15.7053
Tr268_CBM14	CBM14	129.898
Tr270_CBM14	CBM14	522.811
Tr271_CBM14	CBM14	1441.65
Tr273_CBM14	CBM14	479.56
Tr274_CBM14	CBM14	442.521
Tr275_CBM14	CBM14	146.063
Tr276_CBM14	CBM14	1408.24
Tr28_CBM14	CBM14	439.748
Tr285_CBM14	CBM14	651.227
Tr289_CBM14	CBM14	27.4842
Tr298_CBM14	CBM14	79.5863
Tr30_CBM14	CBM14	981.158
Tr302_CBM14	CBM14	1021.58
Tr310_CBM14	CBM14	380.006
Tr311_CBM14	CBM14	138.884
Tr318_CBM14	CBM14	1472.58
Tr321_CBM14	CBM14	205.233
Tr322_CBM14	CBM14	68.684
Tr325_CBM14	CBM14	188.818
Tr329_CBM14	CBM14	190.768
Tr330_CBM14	CBM14	312.576
Tr331_CBM14	CBM14	65.2901
Tr332_CBM14	CBM14	502.742
Tr333_CBM14	CBM14	769.99
Tr334_CBM14	CBM14	125.494
Tr341_CBM14	CBM14	982.052
Tr345_CBM14	CBM14	296.338
Tr346_CBM14	CBM14	98.3331
Tr352_CBM14	CBM14	15.4298
Tr353_CBM14	CBM14	47.939
Tr357_CBM14	CBM14	397.836
Tr358_CBM14	CBM14	147.217
Tr359_CBM14	CBM14	804.093
Tr364_CBM14	CBM14	545.436
Tr366_CBM14	CBM14	56.9445
Tr367_CBM14	CBM14	883.407
Tr368_CBM14	CBM14	937.607
Tr369_CBM14	CBM14	132.212
Tr371_CBM14	CBM14	1567.45
Tr375_CBM14	CBM14	102.865
Tr377_CBM14	CBM14	1110.37
Tr381_CBM14	CBM14	983.513
Tr384_CBM14	CBM14	1832.28
Tr385_CBM14	CBM14	555.742
Tr391_CBM14	CBM14	467.668
Tr396_CBM14	CBM14	870.184
Tr4_CBM14	CBM14	1761.53
Tr400_CBM14	CBM14	875.335
Tr403_CBM14	CBM14	413.852
Tr404_CBM14	CBM14	2819.44
Tr408_CBM14	CBM14	107.91
Tr409_CBM14	CBM14	150.949
Tr413_CBM14	CBM14	2283.88
Tr414_CBM14	CBM14	725.061
Tr421_CBM14	CBM14	5462.19
Tr425_CBM14	CBM14	571.492
Tr434_CBM14	CBM14	776.68
Tr435_CBM14	CBM14	334.027
Tr437_CBM14	CBM14	84.0971
Tr439_CBM14	CBM14	435.107
Tr440_CBM14	CBM14	26.5641
Tr441_CBM14	CBM14	1238.41
Tr458_CBM14	CBM14	573.176
Tr459_CBM14	CBM14	276.693
Tr464_CBM14	CBM14	94.484
Tr467_CBM14	CBM14	225.477
Tr468_CBM14	CBM14	175.104
Tr469_CBM14	CBM14	80.885
Tr470_CBM14	CBM14	161.953
Tr479_CBM14	CBM14	122.725
Tr48_CBM14	CBM14	1245.02
Tr481_CBM14	CBM14	312.285
Tr486_CBM14	CBM14	163.444
Tr487_CBM14	CBM14	205.521
Tr488_CBM14	CBM14	1240.78
Tr491_CBM14	CBM14	48.4304
Tr492_CBM14	CBM14	12667.4
Tr494_CBM14	CBM14	150.488
Tr495_CBM14	CBM14	1186.48
Tr496_CBM14	CBM14	412.024
Tr497_CBM14	CBM14	273.621
Tr498_CBM14	CBM14	2991.78
Tr5_CBM14	CBM14	649.193
Tr500_CBM14	CBM14	283.794
Tr502_CBM14	CBM14	42.8685
Tr503_CBM14	CBM14	3735.02
Tr505_CBM14	CBM14	22.8755
Tr506_CBM14	CBM14	136.162
Tr507_CBM14	CBM14	140.999
Tr513_CBM14	CBM14	84.5669
Tr521_CBM14	CBM14	4663.01
Tr524_CBM14	CBM14	296.194
Tr525_CBM14	CBM14	49.1625
Tr529_CBM14	CBM14	357.135
Tr530_CBM14	CBM14	343.21
Tr541_CBM14	CBM14	80.8942
Tr543_CBM14	CBM14	606.148
Tr544_CBM14	CBM14	2317.61
Tr545_CBM14	CBM14	14547.7
Tr548_CBM14	CBM14	146.862
Tr549_CBM14	CBM14	438.784
Tr550_CBM14	CBM14	211.934
Tr551_CBM14	CBM14	1002.19
Tr552_CBM14	CBM14	6309.83
Tr555_CBM14	CBM14	87.2036
Tr561_CBM14	CBM14	296.924
Tr562_CBM14	CBM14	26.9871
Tr566_CBM14	CBM14	17.2064
Tr567_CBM14	CBM14	1065.78
Tr569_CBM14	CBM14	27.6931
Tr570_CBM14	CBM14	210.015
Tr571_CBM14	CBM14	398.421
Tr572_CBM14	CBM14	473.003
Tr576_CBM14	CBM14	166.175
Tr578_CBM14	CBM14	127.794
Tr579_CBM14	CBM14	169.705
Tr580_CBM14	CBM14	83.6231
Tr582_CBM14	CBM14	1326.27
Tr585_CBM14	CBM14	557.636
Tr586_CBM14	CBM14	1019.54
Tr587_CBM14	CBM14	41.6016
Tr588_CBM14	CBM14	11.3879
Tr590_CBM14	CBM14	205.081
Tr591_CBM14	CBM14	1086.95
Tr592_CBM14	CBM14	1775.39
Tr593_CBM14	CBM14	722.86
Tr594_CBM14	CBM14	111.999
Tr595_CBM14	CBM14	1489.38
Tr597_CBM14	CBM14	451.358
Tr598_CBM14	CBM14	124.789
Tr599_CBM14	CBM14	13.2988
Tr608_CBM14	CBM14	116.071
Tr609_CBM14	CBM14	444.487
Tr615_CBM14	CBM14	712.627
Tr618_CBM14	CBM14	144.584
Tr623_CBM14	CBM14	284.308
Tr628_CBM14	CBM14	209.921
Tr632_CBM14	CBM14	662.193
Tr633_CBM14	CBM14	101.241
Tr634_CBM14	CBM14	35.8944
Tr635_CBM14	CBM14	22.3382
Tr638_CBM14	CBM14	61.8159
Tr642_CBM14	CBM14	593.757
Tr644_CBM14	CBM14	1006.53
Tr645_CBM14	CBM14	88.7498
Tr649_CBM14	CBM14	43.8616
Tr651_CBM14	CBM14	34.9691
Tr652_CBM14	CBM14	430.086
Tr653_CBM14	CBM14	47.4238
Tr655_CBM14	CBM14	139.765
Tr658_CBM14	CBM14	184.989
Tr660_CBM14	CBM14	56.2858
Tr661_CBM14	CBM14	224.496
Tr668_CBM14	CBM14	81.9302
Tr670_CBM14	CBM14	832.415
Tr671_CBM14	CBM14	630.17
Tr672_CBM14	CBM14	188.525
Tr673_CBM14	CBM14	46.2893
Tr676_CBM14	CBM14	607.975
Tr678_CBM14	CBM14	199.515
Tr680_CBM14	CBM14	4578.14
Tr681_CBM14	CBM14	275.193
Tr682_CBM14	CBM14	296.592
Tr683_CBM14	CBM14	2101.25
Tr686_CBM14	CBM14	148.887
Tr689_CBM14	CBM14	178.564
Tr690_CBM14	CBM14	667.836
Tr693_CBM14	CBM14	26.8106
Tr694_CBM14	CBM14	75.2318
Tr695_CBM14	CBM14	24.0958
Tr696_CBM14	CBM14	85.5065
Tr697_CBM14	CBM14	27.9768
Tr698_CBM14	CBM14	604.552
Tr699_CBM14	CBM14	758.032
Tr70_CBM14	CBM14	23.0605
Tr701_CBM14	CBM14	460.819
Tr702_CBM14	CBM14	353.361
Tr703_CBM14	CBM14	234.245
Tr707_CBM14	CBM14	1249.22
Tr708_CBM14	CBM14	1233.35
Tr709_CBM14	CBM14	49.9501
Tr710_CBM14	CBM14	1273.96
Tr711_CBM14	CBM14	499.035
Tr715_CBM14	CBM14	513.685
Tr716_CBM14	CBM14	146.264
Tr717_CBM14	CBM14	398.735
Tr724_CBM14	CBM14	43.5512
Tr725_CBM14	CBM14	75.9979
Tr726_CBM14	CBM14	288.817
Tr728_CBM14	CBM14	252.314
Tr729_CBM14	CBM14	10.7598
Tr732_CBM14	CBM14	377.035
Tr734_CBM14	CBM14	242.821
Tr736_CBM14	CBM14	51.1172
Tr737_CBM14	CBM14	32.9168
Tr738_CBM14	CBM14	35.4118
Tr739_CBM14	CBM14	90.5867
Tr740_CBM14	CBM14	61.5091
Tr741_CBM14	CBM14	259.851
Tr742_CBM14	CBM14	1465.83
Tr750_CBM14	CBM14	387.096
Tr753_CBM14	CBM14	2.5474
Tr754_CBM14	CBM14	1878.44
Tr759_CBM14	CBM14	16.0883
Tr761_CBM14	CBM14	78.5578
Tr770_CBM14	CBM14	37.5252
Tr771_CBM14	CBM14	3562.77
Tr774_CBM14	CBM14	1654.79
Tr775_CBM14	CBM14	251.079
Tr779_CBM14	CBM14	27.5273
Tr780_CBM14	CBM14	279.446
Tr781_CBM14	CBM14	522.321
Tr784_CBM14	CBM14	1954.74
Tr786_CBM14	CBM14	116.141
Tr787_CBM14	CBM14	4225.99
Tr788_CBM14	CBM14	3875.55
Tr791_CBM14	CBM14	159.402
Tr792_CBM14	CBM14	35.6921
Tr793_CBM14	CBM14	100.776
Tr796_CBM14	CBM14	1346.49
Tr798_CBM14	CBM14	1423.95
Tr800_CBM14	CBM14	198.194
Tr805_CBM14	CBM14	762.424
Tr806_CBM14	CBM14	16001.3
Tr811_CBM14	CBM14	168.2
Tr813_CBM14	CBM14	357.899
Tr828_CBM14	CBM14	385.339
Tr83_CBM14	CBM14	3719.68
Tr830_CBM14	CBM14	16.8247
Tr834_CBM14	CBM14	566.88
Tr835_CBM14	CBM14	61.3602
Tr847_CBM14	CBM14	458.474
Tr848_CBM14	CBM14	4593.14
Tr856_CBM14	CBM14	29534
Tr857_CBM14	CBM14	202.273
Tr859_CBM14	CBM14	112.941
Tr87_CBM14	CBM14	224.997
Tr876_CBM14	CBM14	79.4233
Tr877_CBM14	CBM14	289.501
Tr878_CBM14	CBM14	77.3631
Tr883_CBM14	CBM14	239.254
Tr885_CBM14	CBM14	4148.03
Tr887_CBM14	CBM14	190.109
Tr889_CBM14	CBM14	257.215
Tr890_CBM14	CBM14	1072.22
Tr893_CBM14	CBM14	116.366
Tr897_CBM14	CBM14	57.5009
Tr903_CBM14	CBM14	9.653
Tr906_CBM14	CBM14	33.3365
Tr934_CBM14	CBM14	2318.09
Tr937_CBM14	CBM14	193.042
Tr939_CBM14	CBM14	547.954
Tr940_CBM14	CBM14	78.0351
Tr941_CBM14	CBM14	316.159
Tr949_CBM14	CBM14	173.737
Tr950_CBM14	CBM14	277.46
Tr951_CBM14	CBM14	50.412
Tr952_CBM14	CBM14	216.032
Tr954_CBM14	CBM14	1973.15
Tr961_CBM14	CBM14	1411.64
Tr964_CBM14	CBM14	334.657
Tr967_CBM14	CBM14	2717.77
Tr973_CBM14	CBM14	541.949
Tr987_CBM14	CBM14	3.5991
Tr997_CBM14	CBM14	38.0787
Tr998_CBM14	CBM14	3673.36
Tr1105_CBM14-CE4	CBM14 CE4	110.757
Tr1207_CBM14-CE4	CBM14 CE4	32.9783
Tr1210_CBM14-CE4	CBM14 CE4	55.1661
Tr1211_CBM14-CE4	CBM14 CE4	30.4218
Tr22_CBM14-CE4	CBM14 CE4	1567.49
Tr317_CBM14-CE4	CBM14 CE4	364.712
Tr349_CBM14-CE4	CBM14 CE4	134.904
Tr1239_CBM14-GH18	CBM14 GH18	44.5234
Tr146_CBM14-GH18	CBM14 GH18	44.569
Tr351_CBM14-GH18	CBM14 GH18	125.335
Tr474_CBM14-GH18	CBM14 GH18	39.8965
Tr575_CBM14-GH18	CBM14 GH18	254.302
Tr1247_CBM20	CBM20	139.403
Tr1248_CBM20	CBM20	1328.82
Tr163_CBM20	CBM20	613.851
Tr372_CBM20	CBM20	16.8414
Tr1214_CBM21	CBM21	132.527
Tr452_CBM21	CBM21	375.932
Tr733_CBM21	CBM21	978.69
Tr910_CBM23	CBM23	170.364
Tr688_CBM31	CBM31	156.97
Tr1042_CBM32	CBM32	39.0436
Tr1162_CBM32	CBM32	341.682
Tr149_CBM32	CBM32	1274.18
Tr183_CBM32	CBM32	69.0923
Tr27_CBM32	CBM32	216.551
Tr284_CBM32	CBM32	14.2361
Tr443_CBM32	CBM32	3.9292
Tr604_CBM32	CBM32	6.6936
Tr63_CBM32	CBM32	16.3843
Tr67_CBM32	CBM32	59.8639
Tr78_CBM32	CBM32	713.765
Tr959_CBM32	CBM32	1037
Tr985_CBM32	CBM32	28.968
Tr107_CBM32-CBM47	CBM32 CBM47	342.869
Tr1217_CBM32-CBM66	CBM32 CBM66	412.049
Tr68_CBM32-CBM66	CBM32 CBM66	242.57
Tr40_CBM35	CBM35	505.537
Tr1112_CBM37	CBM37	564.712
Tr1222_CBM37	CBM37	43.814
Tr319_CBM37	CBM37	11.4486
Tr433_CBM37	CBM37	45.3012
Tr55_CBM37	CBM37	64.7509
Tr607_CBM37	CBM37	20.9855
Tr1213_CBM47	CBM47	543.941
Tr1238_CBM47	CBM47	732.629
Tr355_CBM47	CBM47	646.009
Tr57_CBM47	CBM47	254.672
Tr822_CBM47	CBM47	90.5209
Tr947_CBM47	CBM47	484.136
Tr98_CBM47	CBM47	1849.38
Tr818_CBM48	CBM48	978.818
Tr984_CBM48	CBM48	767.537
Tr104_CBM50	CBM50	42.5296
Tr624_CBM50	CBM50	106.303
Tr919_CBM50	CBM50	592.124
Tr929_CBM50	CBM50	624.533
Tr790_CBM53	CBM53	824.014
Tr376_CBM56	CBM56	135.631
Tr38_CBM57	CBM57	464.178
Tr428_CBM57	CBM57	7748.05
Tr153_CBM67	CBM67	28.3708
Tr195_CBM67	CBM67	1100.64
Tr65_CBM67-CBM14	CBM67 CBM14	111.346
Tr1018_CE1	CE1	37.5644
Tr1019_CE1	CE1	1531.77
Tr1074_CE1	CE1	1654.22
Tr1114_CE1	CE1	294.246
Tr1115_CE1	CE1	30.7685
Tr1132_CE1	CE1	312.271
Tr121_CE1	CE1	242.943
Tr1226_CE1	CE1	514.535
Tr1236_CE1	CE1	253.276
Tr1250_CE1	CE1	14.4795
Tr1297_CE1	CE1	3186.42
Tr1313_CE1	CE1	155.154
Tr167_CE1	CE1	55.3802
Tr202_CE1	CE1	85.7558
Tr277_CE1	CE1	206.23
Tr292_CE1	CE1	348.998
Tr306_CE1	CE1	327.515
Tr307_CE1	CE1	189.784
Tr31_CE1	CE1	780.488
Tr32_CE1	CE1	47.1008
Tr402_CE1	CE1	207.955
Tr457_CE1	CE1	217.995
Tr473_CE1	CE1	8311.93
Tr475_CE1	CE1	302.54
Tr535_CE1	CE1	1657.94
Tr677_CE1	CE1	192.104
Tr746_CE1	CE1	370.13
Tr747_CE1	CE1	36.2084
Tr833_CE1	CE1	2119.77
Tr84_CE1	CE1	117.218
Tr865_CE1	CE1	121.113
Tr927_CE1	CE1	385.33
Tr999_CE1	CE1	2031.73
Tr1_CE10	CE10	148.518
Tr1007_CE10	CE10	429.774
Tr1046_CE10	CE10	349.433
Tr1057_CE10	CE10	37.4091
Tr1142_CE10	CE10	2.6036
Tr1158_CE10	CE10	212.377
Tr1180_CE10	CE10	842.801
Tr1193_CE10	CE10	72.0145
Tr1224_CE10	CE10	142.465
Tr1227_CE10	CE10	3.7354
Tr1254_CE10	CE10	95.4369
Tr127_CE10	CE10	27.7537
Tr1275_CE10	CE10	43.9748
Tr1290_CE10	CE10	1864.77
Tr1300_CE10	CE10	687.777
Tr1306_CE10	CE10	157.838
Tr14_CE10	CE10	184.202
Tr155_CE10	CE10	164.905
Tr170_CE10	CE10	375.072
Tr177_CE10	CE10	248.245
Tr194_CE10	CE10	3.349
Tr201_CE10	CE10	130.627
Tr209_CE10	CE10	444.53
Tr210_CE10	CE10	105.047
Tr211_CE10	CE10	258.872
Tr212_CE10	CE10	346.555
Tr228_CE10	CE10	8.0349
Tr26_CE10	CE10	276.442
Tr286_CE10	CE10	500.304
Tr300_CE10	CE10	893.812
Tr308_CE10	CE10	77.1488
Tr309_CE10	CE10	19.0179
Tr313_CE10	CE10	223.91
Tr323_CE10	CE10	343.591
Tr327_CE10	CE10	1425.06
Tr339_CE10	CE10	39.9909
Tr347_CE10	CE10	115.575
Tr35_CE10	CE10	103.628
Tr36_CE10	CE10	35.6502
Tr389_CE10	CE10	16.8934
Tr416_CE10	CE10	52.2238
Tr424_CE10	CE10	111.676
Tr446_CE10	CE10	3047.45
Tr453_CE10	CE10	87.8187
Tr47_CE10	CE10	278.578
Tr489_CE10	CE10	97.851
Tr531_CE10	CE10	318.765
Tr574_CE10	CE10	4969.97
Tr583_CE10	CE10	222.217
Tr625_CE10	CE10	57.7114
Tr643_CE10	CE10	205.895
Tr664_CE10	CE10	9.439
Tr666_CE10	CE10	21.236
Tr704_CE10	CE10	1184.99
Tr727_CE10	CE10	27.5816
Tr731_CE10	CE10	55.8162
Tr74_CE10	CE10	33.7715
Tr744_CE10	CE10	185.399
Tr745_CE10	CE10	269.368
Tr758_CE10	CE10	275.366
Tr764_CE10	CE10	844.332
Tr794_CE10	CE10	835.547
Tr8_CE10	CE10	31.8105
Tr819_CE10	CE10	45.958
Tr820_CE10	CE10	353.749
Tr821_CE10	CE10	220.132
Tr823_CE10	CE10	380.601
Tr827_CE10	CE10	31.6515
Tr851_CE10	CE10	270.724
Tr854_CE10	CE10	50.467
Tr872_CE10	CE10	314.058
Tr873_CE10	CE10	73.9342
Tr875_CE10	CE10	63.5872
Tr88_CE10	CE10	14.3661
Tr882_CE10	CE10	101.852
Tr899_CE10	CE10	2149.47
Tr92_CE10	CE10	35.8742
Tr921_CE10	CE10	541.165
Tr922_CE10	CE10	24.7402
Tr93_CE10	CE10	211.259
Tr938_CE10	CE10	34.6588
Tr94_CE10	CE10	29.0594
Tr948_CE10	CE10	22.6989
Tr958_CE10	CE10	336.259
Tr977_CE10	CE10	606.097
Tr200_CE12	CE12	308.595
Tr647_CE12	CE12	436.021
Tr1059_CE3	CE3	2912.81
Tr1068_CE3	CE3	431.878
Tr1116_CE3	CE3	36.7513
Tr1117_CE3	CE3	560.774
Tr1168_CE3	CE3	30.8373
Tr1272_CE3	CE3	37.8007
Tr1273_CE3	CE3	35.4906
Tr1274_CE3	CE3	335.376
Tr1288_CE3	CE3	32.7382
Tr1289_CE3	CE3	16.6859
Tr251_CE3	CE3	4440.53
Tr390_CE3	CE3	228.922
Tr395_CE3	CE3	384.469
Tr465_CE3	CE3	77.7014
Tr581_CE3	CE3	388.507
Tr648_CE3	CE3	106.587
Tr685_CE3	CE3	1513.75
Tr730_CE3	CE3	137.132
Tr757_CE3	CE3	74.1313
Tr115_CE4	CE4	33.5662
Tr1208_CE4-CBM14	CE4 CBM14	65.354
Tr1209_CE4-CBM14	CE4 CBM14	30.2628
Tr283_CE4-CBM14	CE4 CBM14	5992.95
Tr864_CE4-CBM14	CE4 CBM14	384.055
Tr884_CE4-CBM14	CE4 CBM14	244.274
Tr206_CE9	CE9	3742.8
Tr394_CE9	CE9	228.165
Tr1167_GH109	GH109	42.769
Tr1212_GH109	GH109	11.376
Tr296_GH109	GH109	207.375
Tr419_GH109	GH109	198.772
Tr532_GH109	GH109	559.576
Tr610_GH109	GH109	25.1994
Tr808_GH109	GH109	6.3378
Tr968_GH109	GH109	115.357
Tr213_GH116	GH116	19.3902
Tr888_GH116	GH116	116.245
Tr454_GH120	GH120	362.443
Tr963_GH120	GH120	1967.02
Tr1024_GH13	GH13	32.9585
Tr1259_GH13	GH13	127.038
Tr135_GH13	GH13	83.7441
Tr187_GH13	GH13	9.535
Tr338_GH13	GH13	645.294
Tr383_GH13	GH13	37.0397
Tr44_GH13	GH13	87.2805
Tr483_GH13	GH13	143.965
Tr493_GH13	GH13	202.758
Tr540_GH13	GH13	620.449
Tr637_GH13	GH13	80.1624
Tr749_GH13	GH13	8.1842
Tr896_GH13	GH13	2167.77
Tr960_GH13	GH13	845.441
Tr301_GH13-CBM48	GH13 CBM48	417.456
Tr1280_GH133	GH133	77.2684
Tr560_GH133	GH133	35.2253
Tr765_GH133	GH133	236.729
Tr785_GH133	GH133	94.881
Tr795_GH133	GH133	77.9786
Tr881_GH133	GH133	403.016
Tr902_GH133	GH133	27.4628
Tr156_GH15	GH15	873.502
Tr161_GH15	GH15	15.9566
Tr278_GH15	GH15	81.0883
Tr279_GH15	GH15	4.407
Tr568_GH15	GH15	27.9291
Tr69_GH16	GH16	92.084
Tr1003_GH18	GH18	211.015
Tr103_GH18	GH18	199.09
Tr1038_GH18	GH18	35.3251
Tr1039_GH18	GH18	591.968
Tr1040_GH18	GH18	96.9486
Tr1070_GH18	GH18	30.668
Tr1071_GH18	GH18	4.3756
Tr1072_GH18	GH18	72.1808
Tr1086_GH18	GH18	337.863
Tr1087_GH18	GH18	267.599
Tr1088_GH18	GH18	251.574
Tr1089_GH18	GH18	9727.29
Tr1090_GH18	GH18	32.8836
Tr1127_GH18	GH18	407.963
Tr1147_GH18	GH18	605.731
Tr1150_GH18	GH18	17.6583
Tr1152_GH18	GH18	40.0485
Tr1153_GH18	GH18	226.272
Tr1164_GH18	GH18	20.5914
Tr1165_GH18	GH18	39.4646
Tr1182_GH18	GH18	2287.52
Tr1183_GH18	GH18	24.8947
Tr1184_GH18	GH18	383.077
Tr1185_GH18	GH18	744.836
Tr1231_GH18	GH18	424.861
Tr1234_GH18	GH18	263.922
Tr1243_GH18	GH18	548.858
Tr1244_GH18	GH18	643.335
Tr1245_GH18	GH18	246.084
Tr1251_GH18	GH18	5522.14
Tr1252_GH18	GH18	5740.63
Tr1253_GH18	GH18	290.615
Tr1264_GH18	GH18	104.555
Tr1265_GH18	GH18	66.7765
Tr1266_GH18	GH18	120.931
Tr1267_GH18	GH18	52.0754
Tr1268_GH18	GH18	38.2927
Tr1269_GH18	GH18	1046.62
Tr1270_GH18	GH18	227.647
Tr1271_GH18	GH18	52.3509
Tr1286_GH18	GH18	100.419
Tr1287_GH18	GH18	30.6204
Tr1292_GH18	GH18	229.868
Tr1293_GH18	GH18	17.6243
Tr1294_GH18	GH18	886.714
Tr1295_GH18	GH18	2323.25
Tr1296_GH18	GH18	1408.78
Tr1303_GH18	GH18	91.8797
Tr1315_GH18	GH18	202.629
Tr1316_GH18	GH18	1078.61
Tr1318_GH18	GH18	366.737
Tr141_GH18	GH18	32.0921
Tr142_GH18	GH18	1226.02
Tr154_GH18	GH18	200.33
Tr178_GH18	GH18	659.217
Tr179_GH18	GH18	188.246
Tr180_GH18	GH18	295.914
Tr181_GH18	GH18	276.878
Tr216_GH18	GH18	380.233
Tr217_GH18	GH18	1638.44
Tr223_GH18	GH18	137.825
Tr225_GH18	GH18	1232.23
Tr258_GH18	GH18	928.481
Tr259_GH18	GH18	54.2691
Tr260_GH18	GH18	32.6361
Tr293_GH18	GH18	55.0562
Tr328_GH18	GH18	4000.54
Tr378_GH18	GH18	1689.25
Tr382_GH18	GH18	10271.6
Tr448_GH18	GH18	665.833
Tr51_GH18	GH18	223.121
Tr536_GH18	GH18	1240.2
Tr546_GH18	GH18	446.041
Tr564_GH18	GH18	31.7845
Tr62_GH18	GH18	241.112
Tr659_GH18	GH18	41.6428
Tr7_GH18	GH18	82.8024
Tr705_GH18	GH18	384.832
Tr73_GH18	GH18	59.1258
Tr766_GH18	GH18	2743.74
Tr767_GH18	GH18	458.51
Tr77_GH18	GH18	691.939
Tr772_GH18	GH18	2949.18
Tr773_GH18	GH18	7.4324
Tr824_GH18	GH18	1294.81
Tr825_GH18	GH18	569.451
Tr841_GH18	GH18	74.1797
Tr842_GH18	GH18	1405.99
Tr843_GH18	GH18	620.241
Tr844_GH18	GH18	963.645
Tr845_GH18	GH18	226.745
Tr855_GH18	GH18	986.234
Tr860_GH18	GH18	62.7633
Tr861_GH18	GH18	207.659
Tr867_GH18	GH18	2276.49
Tr868_GH18	GH18	50.2649
Tr869_GH18	GH18	1205.33
Tr870_GH18	GH18	383.058
Tr891_GH18	GH18	293.566
Tr892_GH18	GH18	775.206
Tr9_GH18	GH18	64.5262
Tr924_GH18	GH18	4.631
Tr925_GH18	GH18	5.0951
Tr926_GH18	GH18	137.421
Tr944_GH18	GH18	23.9537
Tr945_GH18	GH18	31.6691
Tr946_GH18	GH18	5.6552
Tr988_GH18	GH18	4.6477
Tr989_GH18	GH18	10556.8
Tr990_GH18	GH18	12080.9
Tr147_GH18-CBM14	GH18 CBM14	11.0213
Tr1035_GH2	GH2	66.3388
Tr1122_GH2	GH2	33.0587
Tr1302_GH2	GH2	14.5147
Tr191_GH2	GH2	71.9465
Tr192_GH2	GH2	1449.86
Tr324_GH2	GH2	16.8553
Tr365_GH2	GH2	27.8332
Tr392_GH2	GH2	34.0952
Tr511_GH2	GH2	36.327
Tr59_GH2	GH2	65.4702
Tr81_GH2	GH2	18.8008
Tr814_GH2	GH2	292.608
Tr96_GH2	GH2	689.452
Tr980_GH2	GH2	212.025
Tr1008_GH20	GH20	67.6732
Tr1050_GH20	GH20	85.0125
Tr1156_GH20	GH20	675.951
Tr1187_GH20	GH20	671.408
Tr122_GH20	GH20	35.5469
Tr15_GH20	GH20	575.86
Tr158_GH20	GH20	615.676
Tr159_GH20	GH20	44.3826
Tr23_GH20	GH20	34.8629
Tr249_GH20	GH20	837.344
Tr401_GH20	GH20	456.445
Tr412_GH20	GH20	75.7299
Tr449_GH20	GH20	23.9814
Tr45_GH20	GH20	26.6142
Tr477_GH20	GH20	840.425
Tr490_GH20	GH20	346.389
Tr563_GH20	GH20	274.937
Tr573_GH20	GH20	550.086
Tr617_GH20	GH20	17.2572
Tr850_GH20	GH20	321.997
Tr95_GH20	GH20	27.2055
Tr99_GH20	GH20	1.5269
Tr1219_GH27	GH27	875.891
Tr282_GH27	GH27	4963.26
Tr422_GH27	GH27	345.864
Tr442_GH27	GH27	3666.11
Tr769_GH27	GH27	47.9693
Tr1001_GH29	GH29	57.0391
Tr1029_GH29	GH29	5790.64
Tr1108_GH29	GH29	118.297
Tr116_GH29	GH29	2251.23
Tr117_GH29	GH29	1022.61
Tr1216_GH29	GH29	906.359
Tr342_GH29	GH29	696.609
Tr343_GH29	GH29	43.1034
Tr370_GH29	GH29	140.371
Tr410_GH29	GH29	993.487
Tr480_GH29	GH29	113.991
Tr58_GH29	GH29	261.881
Tr616_GH29	GH29	227.986
Tr752_GH29	GH29	4175.92
Tr782_GH29	GH29	52.6393
Tr797_GH29	GH29	664.135
Tr816_GH29	GH29	448.754
Tr931_GH29	GH29	344.097
Tr1032_GH30	GH30	184.949
Tr1065_GH30	GH30	114.056
Tr109_GH30	GH30	50.3258
Tr110_GH30	GH30	137.545
Tr1111_GH30	GH30	11418.3
Tr1145_GH30	GH30	167.735
Tr1232_GH30	GH30	83.1492
Tr1241_GH30	GH30	1271.01
Tr1242_GH30	GH30	287.353
Tr1257_GH30	GH30	139.284
Tr1258_GH30	GH30	11549.3
Tr1260_GH30	GH30	2920.05
Tr1322_GH30	GH30	313.825
Tr140_GH30	GH30	401.316
Tr220_GH30	GH30	35.9327
Tr222_GH30	GH30	14.0139
Tr272_GH30	GH30	1036.83
Tr326_GH30	GH30	584.778
Tr398_GH30	GH30	160.902
Tr405_GH30	GH30	354.744
Tr426_GH30	GH30	443.361
Tr427_GH30	GH30	22.882
Tr430_GH30	GH30	1073.94
Tr472_GH30	GH30	120.966
Tr533_GH30	GH30	416.17
Tr534_GH30	GH30	304.244
Tr577_GH30	GH30	223.985
Tr684_GH30	GH30	24.2884
Tr735_GH30	GH30	49.6012
Tr776_GH30	GH30	1808.2
Tr778_GH30	GH30	71.4072
Tr803_GH30	GH30	308.93
Tr815_GH30	GH30	400.262
Tr886_GH30	GH30	158.631
Tr89_GH30	GH30	99.7423
Tr932_GH30	GH30	214.903
Tr978_GH30	GH30	30.7126
Tr1002_GH31	GH31	32.9327
Tr1034_GH31	GH31	170.357
Tr1056_GH31	GH31	116.294
Tr106_GH31	GH31	102.51
Tr1160_GH31	GH31	1258.63
Tr1161_GH31	GH31	15.8013
Tr1171_GH31	GH31	959.391
Tr1172_GH31	GH31	18.2953
Tr1261_GH31	GH31	623.74
Tr1291_GH31	GH31	6.9724
Tr240_GH31	GH31	1047.72
Tr241_GH31	GH31	306.929
Tr287_GH31	GH31	7757.87
Tr288_GH31	GH31	847.027
Tr304_GH31	GH31	232.459
Tr356_GH31	GH31	23.8588
Tr429_GH31	GH31	67.5853
Tr447_GH31	GH31	1126.92
Tr461_GH31	GH31	56.2974
Tr522_GH31	GH31	3.6058
Tr537_GH31	GH31	2076.72
Tr538_GH31	GH31	1672.43
Tr539_GH31	GH31	535.503
Tr553_GH31	GH31	892.43
Tr554_GH31	GH31	148.392
Tr596_GH31	GH31	825.332
Tr600_GH31	GH31	399.573
Tr64_GH31	GH31	18.3524
Tr712_GH31	GH31	15.9867
Tr807_GH31	GH31	152.14
Tr826_GH31	GH31	173.34
Tr955_GH31	GH31	25.664
Tr991_GH31	GH31	11.5419
Tr1093_GH35	GH35	1005.95
Tr1094_GH35	GH35	16.6327
Tr1110_GH35	GH35	305.136
Tr1181_GH35	GH35	1431.1
Tr128_GH35	GH35	5537.17
Tr1298_GH35	GH35	77.9483
Tr21_GH35	GH35	289.64
Tr218_GH35	GH35	64.2985
Tr243_GH35	GH35	278.666
Tr411_GH35	GH35	7591.2
Tr451_GH35	GH35	28.3273
Tr974_GH35	GH35	16.8955
Tr261_GH37	GH37	863.59
Tr29_GH37	GH37	756.037
Tr363_GH37	GH37	468.344
Tr456_GH37	GH37	653.845
Tr50_GH37	GH37	564.294
Tr657_GH37	GH37	126.499
Tr662_GH37	GH37	174.23
Tr1023_GH38	GH38	1084.01
Tr1030_GH38	GH38	210.226
Tr1031_GH38	GH38	466.941
Tr193_GH38	GH38	161.931
Tr207_GH38	GH38	134.721
Tr208_GH38	GH38	2034.41
Tr262_GH38	GH38	236.063
Tr263_GH38	GH38	138.841
Tr264_GH38	GH38	78.8895
Tr280_GH38	GH38	39.4252
Tr337_GH38	GH38	994.817
Tr380_GH38	GH38	38.2997
Tr386_GH38	GH38	66.1821
Tr397_GH38	GH38	414.777
Tr406_GH38	GH38	2509
Tr415_GH38	GH38	47.1317
Tr445_GH38	GH38	80.802
Tr455_GH38	GH38	5.277
Tr499_GH38	GH38	113.751
Tr547_GH38	GH38	32.1961
Tr611_GH38	GH38	149.429
Tr768_GH38	GH38	631.01
Tr817_GH38	GH38	84.6122
Tr829_GH38	GH38	18.5603
Tr852_GH38	GH38	12.497
Tr91_GH38	GH38	64.6774
Tr916_GH38	GH38	10.7129
Tr981_GH38	GH38	106.738
Tr982_GH38	GH38	255.787
Tr983_GH38	GH38	75.195
Tr1020_GH47	GH47	13.582
Tr1121_GH47	GH47	120.582
Tr124_GH47	GH47	37.6531
Tr24_GH47	GH47	551.889
Tr601_GH47	GH47	607.443
Tr858_GH47	GH47	34.3422
Tr866_GH47	GH47	586.749
Tr1312_GH5	GH5	547.488
Tr1317_GH5	GH5	1317.01
Tr226_GH5	GH5	428.144
Tr290_GH5	GH5	2920.03
Tr291_GH5	GH5	845.991
Tr388_GH5	GH5	561.176
Tr743_GH5	GH5	432.907
Tr755_GH5	GH5	793.892
Tr763_GH5	GH5	586.555
Tr789_GH5	GH5	414.396
Tr849_GH5	GH5	47.9681
Tr1113_GH56	GH56	1507.62
Tr1186_GH56	GH56	252.729
Tr799_GH56	GH56	459.411
Tr204_GH63	GH63	64.3689
Tr1230_GH74	GH74	47.5376
Tr667_GH75	GH75	1068.28
Tr962_GH79	GH79	18.7969
Tr1013_GH84	GH84	110.645
Tr1014_GH84	GH84	99.6235
Tr1015_GH84	GH84	89.6254
Tr1016_GH84	GH84	78.8861
Tr1017_GH84	GH84	23.0277
Tr387_GH84	GH84	1969.2
Tr399_GH84	GH84	77.6866
Tr602_GH84	GH84	84.4987
Tr812_GH84	GH84	121.2
Tr957_GH84	GH84	321.922
Tr527_GH85	GH85	52.5729
Tr528_GH85	GH85	139.95
Tr663_GH85	GH85	9954.52
Tr928_GH85	GH85	114.832
Tr125_GH89	GH89	102.124
Tr1077_GH9	GH9	18.2051
Tr1177_GH9	GH9	806.365
Tr1229_GH9	GH9	213.792
Tr1279_GH9	GH9	438.418
Tr138_GH9	GH9	40.4743
Tr171_GH9	GH9	2381.11
Tr172_GH9	GH9	102.097
Tr254_GH9	GH9	73.7552
Tr478_GH9	GH9	835.678
Tr485_GH9	GH9	45.9486
Tr504_GH9	GH9	176.558
Tr777_GH9	GH9	949.456
Tr101_GT1	GT1	83.241
Tr1026_GT1	GT1	65.0479
Tr1027_GT1	GT1	86.4003
Tr1041_GT1	GT1	1539.12
Tr1052_GT1	GT1	147.721
Tr1096_GT1	GT1	1800.32
Tr1101_GT1	GT1	100.55
Tr1109_GT1	GT1	48.1275
Tr1126_GT1	GT1	98.716
Tr1155_GT1	GT1	45.8071
Tr1157_GT1	GT1	145.725
Tr1179_GT1	GT1	511.026
Tr118_GT1	GT1	1080.03
Tr1206_GT1	GT1	191.668
Tr1215_GT1	GT1	416.685
Tr123_GT1	GT1	2597.08
Tr1233_GT1	GT1	68.5084
Tr1246_GT1	GT1	62.3544
Tr1282_GT1	GT1	2069.81
Tr134_GT1	GT1	3373.34
Tr143_GT1	GT1	179.599
Tr205_GT1	GT1	184.365
Tr232_GT1	GT1	695.702
Tr235_GT1	GT1	257.905
Tr265_GT1	GT1	146.583
Tr269_GT1	GT1	77.982
Tr3_GT1	GT1	8.8234
Tr335_GT1	GT1	4.9739
Tr360_GT1	GT1	129.352
Tr373_GT1	GT1	16.8801
Tr379_GT1	GT1	31.0801
Tr39_GT1	GT1	98.8944
Tr41_GT1	GT1	192.04
Tr462_GT1	GT1	118.295
Tr463_GT1	GT1	11.1004
Tr482_GT1	GT1	36976.9
Tr484_GT1	GT1	1044.82
Tr514_GT1	GT1	8.0672
Tr556_GT1	GT1	84.3702
Tr557_GT1	GT1	105.25
Tr558_GT1	GT1	98.9507
Tr559_GT1	GT1	32.8448
Tr619_GT1	GT1	14.1466
Tr639_GT1	GT1	1895.27
Tr640_GT1	GT1	37.8571
Tr656_GT1	GT1	101.746
Tr679_GT1	GT1	704.01
Tr713_GT1	GT1	44.2157
Tr718_GT1	GT1	47.4405
Tr719_GT1	GT1	23.2904
Tr72_GT1	GT1	151.288
Tr720_GT1	GT1	69.0548
Tr721_GT1	GT1	125.561
Tr748_GT1	GT1	5566.92
Tr751_GT1	GT1	111.289
Tr760_GT1	GT1	105.534
Tr801_GT1	GT1	596.494
Tr832_GT1	GT1	904.681
Tr836_GT1	GT1	87.9194
Tr837_GT1	GT1	68.4714
Tr838_GT1	GT1	100.793
Tr839_GT1	GT1	183.087
Tr840_GT1	GT1	397.746
Tr862_GT1	GT1	19.7815
Tr871_GT1	GT1	302.501
Tr874_GT1	GT1	193.288
Tr894_GT1	GT1	135.907
Tr895_GT1	GT1	4029.6
Tr901_GT1	GT1	708.39
Tr920_GT1	GT1	589.022
Tr923_GT1	GT1	78.9118
Tr942_GT1	GT1	83.3565
Tr971_GT1	GT1	47.774
Tr972_GT1	GT1	180.657
Tr1006_GT10	GT10	1152.67
Tr1045_GT10	GT10	692.544
Tr1067_GT10	GT10	208.343
Tr1073_GT10	GT10	70.0626
Tr1099_GT10	GT10	22.5052
Tr1166_GT10	GT10	1197.97
Tr1169_GT10	GT10	633.683
Tr1192_GT10	GT10	550.137
Tr1228_GT10	GT10	8235.07
Tr136_GT10	GT10	136.742
Tr221_GT10	GT10	1144.15
Tr229_GT10	GT10	139.547
Tr281_GT10	GT10	2291.11
Tr295_GT10	GT10	1532.2
Tr315_GT10	GT10	330.775
Tr509_GT10	GT10	12.6656
Tr523_GT10	GT10	448.842
Tr54_GT10	GT10	5749.64
Tr614_GT10	GT10	874.507
Tr620_GT10	GT10	80.246
Tr622_GT10	GT10	200.77
Tr631_GT10	GT10	28.4191
Tr641_GT10	GT10	233.09
Tr674_GT10	GT10	139.523
Tr675_GT10	GT10	24.9014
Tr687_GT10	GT10	579.652
Tr691_GT10	GT10	130.089
Tr692_GT10	GT10	38.936
Tr700_GT10	GT10	525.508
Tr762_GT10	GT10	926.448
Tr809_GT10	GT10	1077.38
Tr863_GT10	GT10	128.374
Tr880_GT10	GT10	1171.13
Tr898_GT10	GT10	124.944
Tr909_GT10	GT10	465.233
Tr917_GT10	GT10	109.336
Tr918_GT10	GT10	480.307
Tr975_GT10	GT10	6204.16
Tr996_GT10	GT10	650.738
Tr1049_GT11	GT11	566.384
Tr1055_GT11	GT11	481.162
Tr1104_GT11	GT11	2313.21
Tr1174_GT11	GT11	31.6841
Tr294_GT11	GT11	98.7359
Tr450_GT11	GT11	3029.8
Tr60_GT11	GT11	1761.71
Tr621_GT11	GT11	27.2712
Tr914_GT11	GT11	373.137
Tr956_GT11	GT11	221.84
Tr97_GT11	GT11	149.095
Tr995_GT11	GT11	13.1297
Tr1240_GT13	GT13	1488.49
Tr151_GT13	GT13	8.5261
Tr188_GT13	GT13	32.3007
Tr374_GT13	GT13	1230.33
Tr49_GT13	GT13	190.938
Tr53_GT13	GT13	1127.93
Tr75_GT13	GT13	158.269
Tr76_GT13	GT13	77.7638
Tr994_GT13	GT13	57.2589
Tr1091_GT16	GT16	241.43
Tr111_GT16	GT16	469.8
Tr1124_GT16	GT16	55.2689
Tr133_GT16	GT16	16.8414
Tr173_GT16	GT16	27.4994
Tr174_GT16	GT16	303.167
Tr336_GT16	GT16	1265.4
Tr340_GT16	GT16	68.5901
Tr466_GT16	GT16	67.4648
Tr510_GT16	GT16	429.559
Tr904_GT16	GT16	1671.74
Tr1146_GT2	GT2	1454.22
Tr1235_GT2	GT2	156.355
Tr1301_GT2	GT2	150.956
Tr348_GT2	GT2	2919.36
Tr722_GT2	GT2	1368.85
Tr970_GT2	GT2	137.305
Tr1076_GT20	GT20	1026.67
Tr1218_GT20	GT20	918.763
Tr230_GT21	GT21	81.842
Tr630_GT21	GT21	32.0205
Tr1066_GT22	GT22	44.5915
Tr253_GT22	GT22	1539.95
Tr299_GT22	GT22	188.661
Tr303_GT22	GT22	1013.88
Tr66_GT22	GT22	34.5556
Tr953_GT22	GT22	115.049
Tr198_GT23	GT23	1239.16
Tr102_GT24	GT24	83.0506
Tr515_GT25	GT25	63.0728
Tr565_GT25	GT25	315.418
Tr589_GT25	GT25	411.802
Tr160_GT27	GT27	874.663
Tr444_GT27	GT27	747.936
Tr1120_GT27-CBM13	GT27 CBM13	479.825
Tr113_GT27-CBM13	GT27 CBM13	157.738
Tr1138_GT27-CBM13	GT27 CBM13	269.918
Tr119_GT27-CBM13	GT27 CBM13	572.618
Tr164_GT27-CBM13	GT27 CBM13	120.803
Tr166_GT27-CBM13	GT27 CBM13	202.151
Tr244_GT27-CBM13	GT27 CBM13	489.154
Tr350_GT27-CBM13	GT27 CBM13	658.936
Tr42_GT27-CBM13	GT27 CBM13	46.447
Tr431_GT27-CBM13	GT27 CBM13	67.5692
Tr612_GT27-CBM13	GT27 CBM13	408.18
Tr613_GT27-CBM13	GT27 CBM13	48.8991
Tr1021_GT28	GT28	40.8149
Tr1022_GT28	GT28	582.381
Tr1078_GT28	GT28	116.74
Tr654_GT28	GT28	1359.62
Tr831_GT28	GT28	51.0975
Tr112_GT3	GT3	53.8785
Tr1004_GT31	GT31	77.1898
Tr1033_GT31	GT31	3473.18
Tr108_GT31	GT31	89.6854
Tr1095_GT31	GT31	403.305
Tr1125_GT31	GT31	732.913
Tr1173_GT31	GT31	30859.6
Tr126_GT31	GT31	96.975
Tr1307_GT31	GT31	223.188
Tr1308_GT31	GT31	93.7583
Tr132_GT31	GT31	151.03
Tr139_GT31	GT31	331.261
Tr145_GT31	GT31	76.1495
Tr189_GT31	GT31	408.26
Tr354_GT31	GT31	462.863
Tr393_GT31	GT31	203.199
Tr418_GT31	GT31	468.039
Tr52_GT31	GT31	241.359
Tr526_GT31	GT31	129.716
Tr71_GT31	GT31	1466.37
Tr810_GT31	GT31	49.4053
Tr82_GT31	GT31	567.211
Tr913_GT31	GT31	84.2167
Tr933_GT31	GT31	51.3257
Tr966_GT31	GT31	333.64
Tr992_GT31	GT31	162.87
Tr1054_GT32	GT32	20.3587
Tr1084_GT32	GT32	288.803
Tr1119_GT32	GT32	700.786
Tr1149_GT32	GT32	133.884
Tr501_GT32	GT32	14.0945
Tr516_GT32	GT32	132.362
Tr605_GT32	GT32	177.599
Tr706_GT33	GT33	395.773
Tr1311_GT35	GT35	1276.63
Tr1128_GT39	GT39	106.523
Tr236_GT39	GT39	667.504
Tr314_GT39	GT39	17.0254
Tr34_GT39	GT39	89.6456
Tr476_GT39	GT39	182.716
Tr129_GT4	GT4	305.043
Tr144_GT4	GT4	75.1818
Tr25_GT4	GT4	97.4949
Tr255_GT4	GT4	522.496
Tr56_GT4	GT4	2279.7
Tr636_GT4	GT4	794.745
Tr196_GT41	GT41	119.182
Tr246_GT41	GT41	197.708
Tr247_GT41	GT41	682.233
Tr257_GT41	GT41	182.873
Tr519_GT41	GT41	83.0635
Tr756_GT41	GT41	14.2037
Tr1036_GT43	GT43	127.581
Tr1037_GT43	GT43	384.112
Tr1058_GT43	GT43	167.266
Tr1085_GT43	GT43	97.5353
Tr1134_GT43	GT43	710.27
Tr203_GT43	GT43	622.097
Tr231_GT43	GT43	420.896
Tr312_GT43	GT43	171.482
Tr362_GT43	GT43	805.468
Tr518_GT43	GT43	944.792
Tr6_GT43	GT43	31.0556
Tr80_GT47	GT47	94.5916
Tr61_GT47-GT64	GT47 GT64	75.0028
Tr79_GT47-GT64	GT47 GT64	26.9255
Tr1000_GT49	GT49	238.107
Tr1064_GT49	GT49	1735.54
Tr1225_GT49	GT49	273.784
Tr130_GT49	GT49	449.129
Tr137_GT49	GT49	757.545
Tr214_GT49	GT49	52.212
Tr361_GT49	GT49	68.2942
Tr626_GT49	GT49	365.262
Tr627_GT49	GT49	279.064
Tr650_GT49	GT49	37.0768
Tr783_GT49	GT49	198.897
Tr853_GT49	GT49	390.403
Tr912_GT49	GT49	356.832
Tr969_GT49	GT49	16.287
Tr1011_GT49-GT8	GT49 GT8	39.4557
Tr86_GT49-GT8	GT49 GT8	616.503
Tr1263_GT50	GT50	12.8707
Tr1012_GT54	GT54	200.81
Tr1140_GT54	GT54	192.21
Tr162_GT54	GT54	78.849
Tr665_GT54	GT54	21726.8
Tr43_GT57	GT57	158.053
Tr905_GT57	GT57	270.872
Tr908_GT58	GT58	47.8857
Tr297_GT59	GT59	91.0451
Tr168_GT61	GT61	19.6635
Tr460_GT62	GT62	19195.5
Tr224_GT62-GT25	GT62 GT25	7.3291
Tr37_GT64	GT64	322.61
Tr1106_GT65	GT65	12251.7
Tr407_GT66	GT66	37.1108
Tr976_GT66	GT66	508.418
Tr911_GT68	GT68	40.7547
Tr100_GT7	GT7	7.7694
Tr1159_GT7	GT7	99.9031
Tr182_GT7	GT7	104.769
Tr197_GT7	GT7	20.573
Tr646_GT7	GT7	17.6056
Tr85_GT7	GT7	1993.68
Tr907_GT7	GT7	575.86
Tr943_GT7	GT7	53.8298
Tr915_GT76	GT76	528.844
Tr1025_GT8	GT8	137.385
Tr1060_GT8	GT8	330.171
Tr1061_GT8	GT8	119.2
Tr1062_GT8	GT8	163.81
Tr1063_GT8	GT8	13.2015
Tr1079_GT8	GT8	203.472
Tr1103_GT8	GT8	84.402
Tr131_GT8	GT8	162.495
Tr185_GT8	GT8	33.9542
Tr417_GT8	GT8	61.9227
Tr420_GT8	GT8	2327.26
Tr508_GT8	GT8	89.183
Tr520_GT8	GT8	2289.33
Tr542_GT8	GT8	153.655
Tr879_GT8	GT8	315.496
Tr90_GT8	GT8	208.464
Tr979_GT8	GT8	217.63
Tr993_GT8	GT8	65.2091
Tr1051_GT90	GT90	192.639
Tr250_GT90	GT90	46.2964
Tr936_GT90	GT90	33.6278
Tr1080_GT92	GT92	34.2196
Tr1130_GT92	GT92	458.308
Tr1141_GT92	GT92	245.982
Tr169_GT92	GT92	352.06
Tr215_GT92	GT92	553.466
Tr219_GT92	GT92	179.307
Tr305_GT92	GT92	364.748
Tr33_GT92	GT92	422.724
Tr436_GT92	GT92	216.82
Tr512_GT92	GT92	162.094
Tr603_GT92	GT92	3361.73
Tr606_GT92	GT92	187.701
Tr669_GT92	GT92	102.505
Tr714_GT92	GT92	189.182
Tr846_GT92	GT92	388.822
Tr930_GT92	GT92	118.959
Tr316_GT98	GT98	1333.92
Tr320_PL17	PL17	655.735
Tr629_PL17	PL17	3242.2
Tr239_PL18	PL18	645.542
